# Supplementary material for: Total Synthesis of Loroxanthin
Source: MDPI journal article supplement (doi:10.3390/md20110658), 2022-10-24
Supplement: s1 [file s1]

**Supplementary Materials for**

**Total Synthesis of Loroxanthin**

**Yumiko Yamano <sup>1,2,\*</sup>, Mari Tanabe <sup>2</sup>, Atsushi Shimada <sup>2</sup> and Akimori Wada <sup>2</sup>**

<sup>1</sup> Comprehensive Education and Research Center, Kobe Pharmaceutical University,  
Kobe 658-8558, Japan

<sup>2</sup> Laboratory of Organic Chemistry for Life Science, Kobe Pharmaceutical University,  
Kobe 658-8558, Japan

\* Correspondence: y-yamano@kobepharm-u.ac.jp

## Table of Contents

|                                                                                                                          |    |
|--------------------------------------------------------------------------------------------------------------------------|----|
| <b>Figure S1.</b> <sup>1</sup> H-NMR spectrum (CDCl <sub>3</sub> , 300 MHz) of compound <b>15</b>                        | 3  |
| <b>Figure S2.</b> <sup>13</sup> C-NMR spectrum (CDCl <sub>3</sub> , 75 MHz) of compound <b>15</b>                        | 3  |
| <b>Figure S3.</b> <sup>1</sup> H-NMR spectrum (CDCl <sub>3</sub> , 300 MHz) of compound <b>10</b>                        | 4  |
| <b>Figure S4.</b> <sup>13</sup> C-NMR spectrum (CDCl <sub>3</sub> , 75 MHz) of compound <b>10</b>                        | 4  |
| <b>Figure S5.</b> <sup>1</sup> H-NMR spectrum (CDCl <sub>3</sub> , 300 MHz) of compound <b>16</b>                        | 5  |
| <b>Figure S6.</b> <sup>13</sup> C-NMR spectrum (CDCl <sub>3</sub> , 75 MHz) of compound <b>16</b>                        | 5  |
| <b>Figure S7.</b> <sup>1</sup> H-NMR spectrum (CDCl <sub>3</sub> , 300 MHz) of compound <b>17</b>                        | 6  |
| <b>Figure S8.</b> <sup>13</sup> C-NMR spectrum (CDCl <sub>3</sub> , 75 MHz) of compound <b>17</b>                        | 6  |
| <b>Figure S9.</b> <sup>1</sup> H-NMR spectrum (CDCl <sub>3</sub> , 300 MHz) of compound <b>18</b>                        | 7  |
| <b>Figure S10.</b> <sup>13</sup> C-NMR spectrum (CDCl <sub>3</sub> , 75 MHz) of compound <b>18</b>                       | 7  |
| <b>Figure S11.</b> <sup>1</sup> H-NMR spectrum (CDCl <sub>3</sub> , 500 MHz) of compound <b>19</b>                       | 8  |
| <b>Figure S12.</b> <sup>13</sup> C-NMR spectrum (CDCl <sub>3</sub> , 125 MHz) of compound <b>19</b>                      | 8  |
| <b>Figure S13.</b> <sup>1</sup> H-NMR spectrum (CDCl <sub>3</sub> , 500 MHz) of compound <b>8</b>                        | 9  |
| <b>Figure S14.</b> <sup>13</sup> C-NMR spectrum (CDCl <sub>3</sub> , 125 MHz) of compound <b>8</b>                       | 9  |
| <b>Figure S15.</b> <sup>1</sup> H-NMR spectrum (CDCl <sub>3</sub> , 500 MHz) of 9 <i>E</i> -isomer of compound <b>8</b>  | 10 |
| <b>Figure S16.</b> <sup>13</sup> C-NMR spectrum (CDCl <sub>3</sub> , 125 MHz) of 9 <i>E</i> -isomer of compound <b>8</b> | 10 |
| <b>Figure S17.</b> <sup>1</sup> H-NMR spectrum (CDCl <sub>3</sub> , 300 MHz) of compound <b>23</b>                       | 11 |
| <b>Figure S18.</b> <sup>13</sup> C-NMR spectrum (CDCl <sub>3</sub> , 75 MHz) of compound <b>23</b>                       | 11 |
| <b>Figure S19.</b> <sup>1</sup> H-NMR spectrum (CDCl <sub>3</sub> , 300 MHz) of compound <b>24</b>                       | 12 |
| <b>Figure S20.</b> <sup>13</sup> C-NMR spectrum (CDCl <sub>3</sub> , 75 MHz) of compound <b>24</b>                       | 12 |
| <b>Figure S21.</b> <sup>1</sup> H-NMR spectrum (CDCl <sub>3</sub> , 300 MHz) of compound <b>25</b>                       | 13 |
| <b>Figure S22.</b> <sup>13</sup> C-NMR spectrum (CDCl <sub>3</sub> , 75 MHz) of compound <b>25</b>                       | 13 |
| <b>Figure S19.</b> <sup>1</sup> H-NMR spectrum (CDCl <sub>3</sub> , 500 MHz) of loroxanthin ( <b>1</b> )                 | 14 |
| <b>Figure S20.</b> <sup>13</sup> C-NMR spectrum (CDCl <sub>3</sub> , 125 MHz) of loroxanthin ( <b>1</b> )                | 14 |

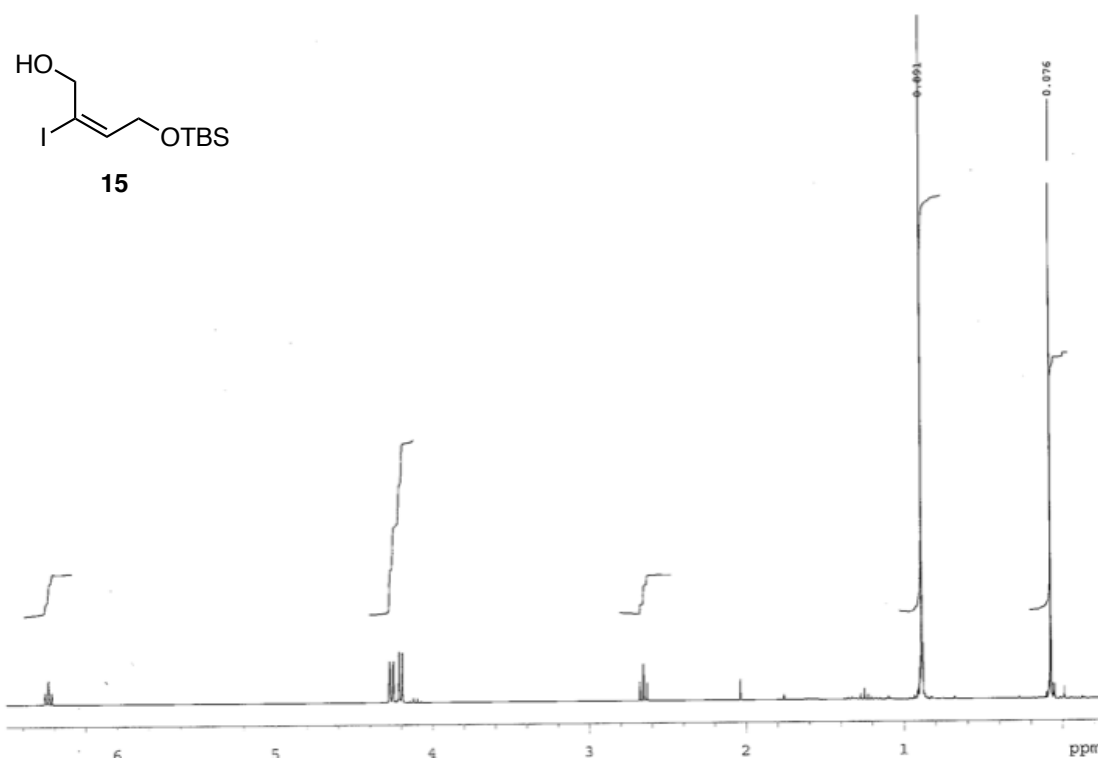

**Figure S1.** <sup>1</sup>H-NMR spectrum (CDCl<sub>3</sub>, 300 MHz) of compound **15**

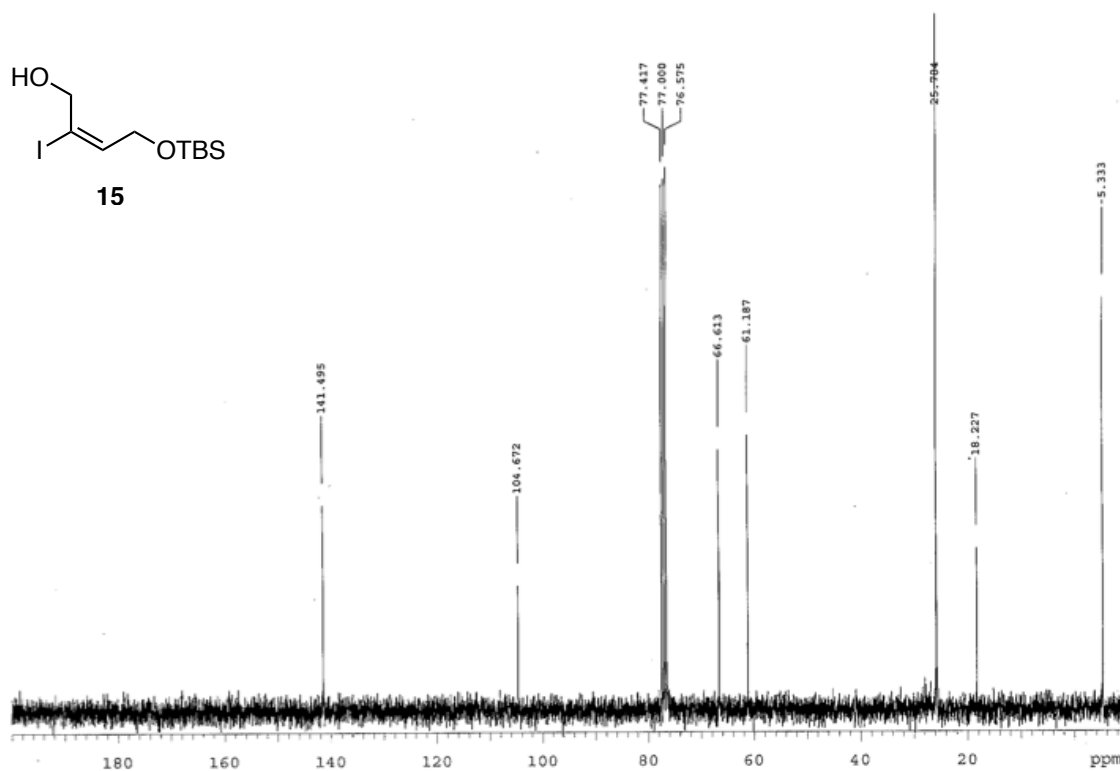

**Figure S2.** <sup>13</sup>C-NMR spectrum (CDCl<sub>3</sub>, 75 MHz) of compound **15**

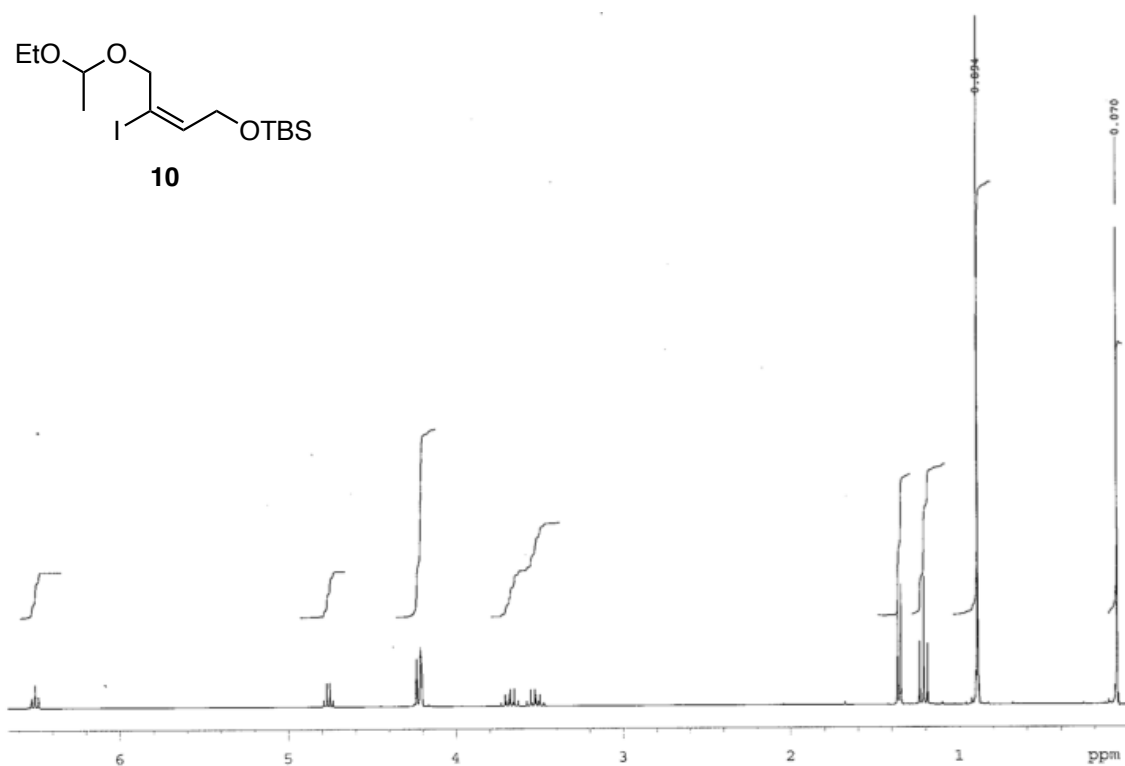

**Figure S3.** <sup>1</sup>H-NMR spectrum (CDCl<sub>3</sub>, 300 MHz) of compound **10**

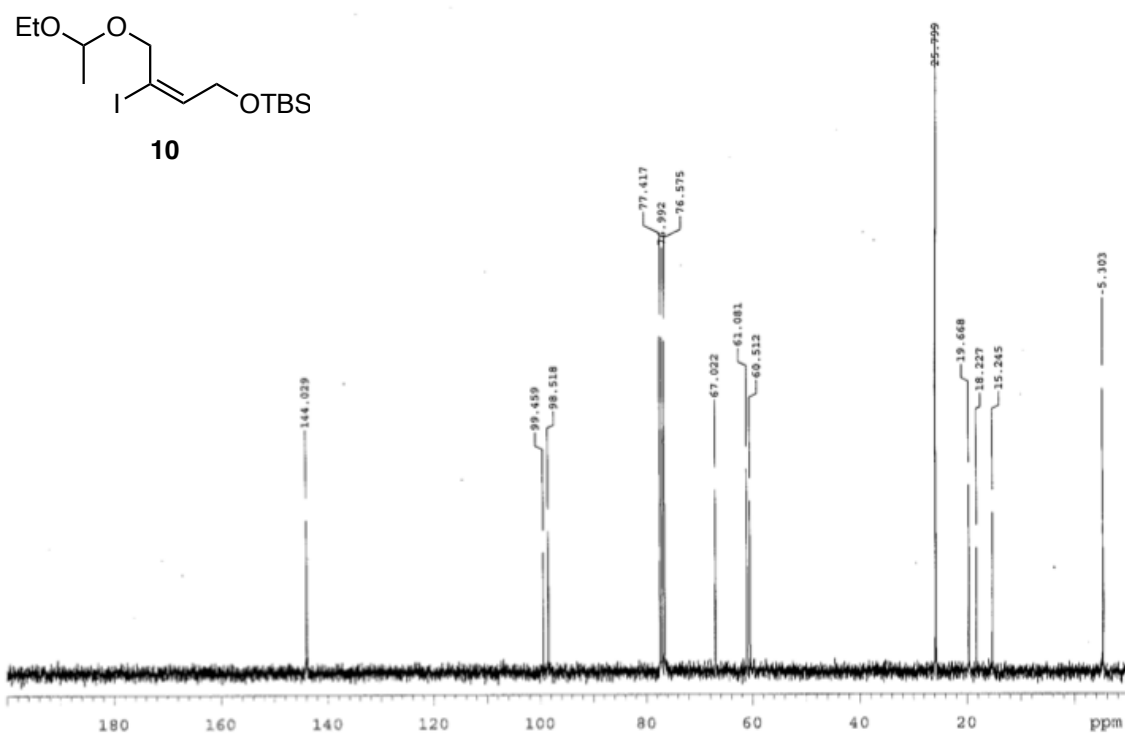

**Figure S4.** <sup>13</sup>C-NMR spectrum (CDCl<sub>3</sub>, 75 MHz) of compound **10**

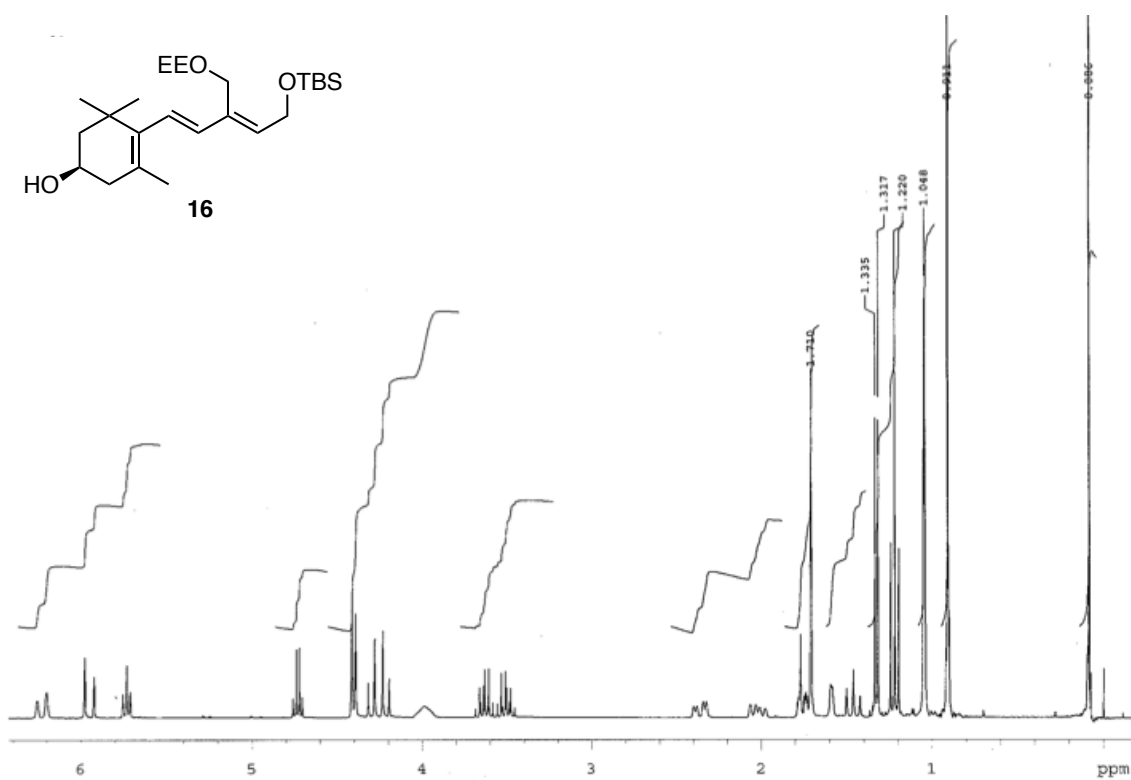

Figure S5.  $^1\text{H}$ -NMR spectrum (CDCl<sub>3</sub>, 300 MHz) of compound **16**

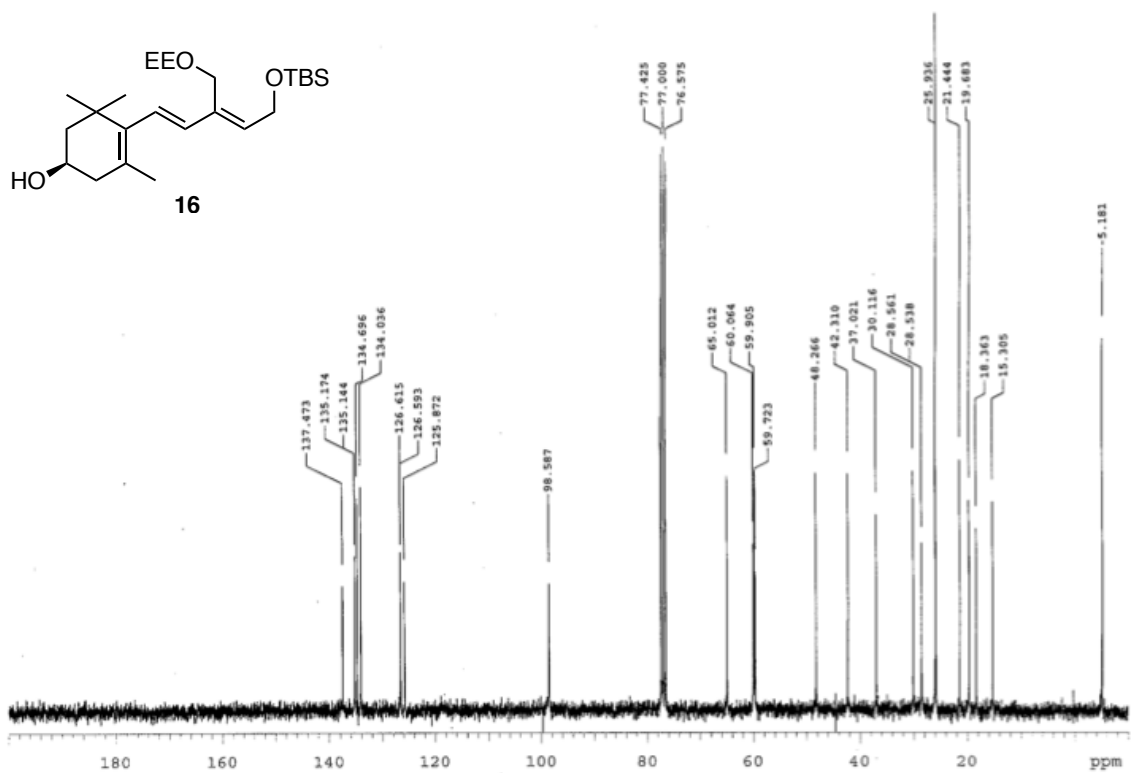

Figure S6.  $^{13}\text{C}$ -NMR spectrum (CDCl<sub>3</sub>, 75 MHz) of compound **16**

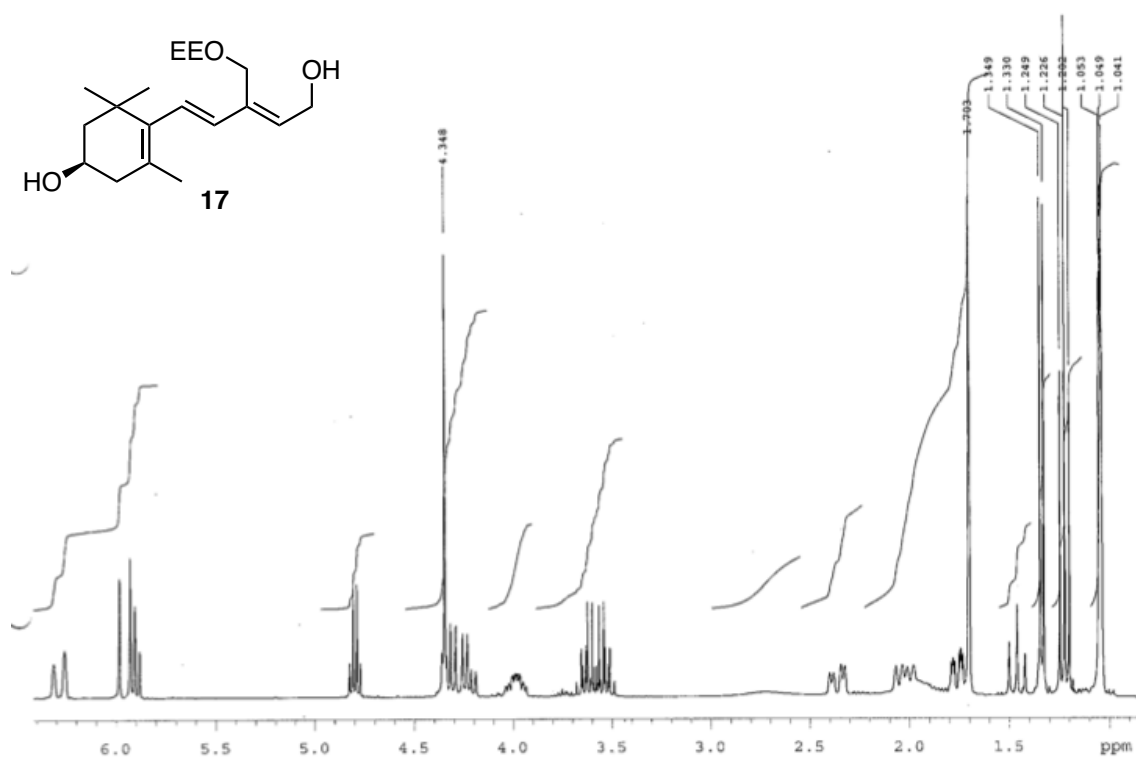

Figure S7. <sup>1</sup>H-NMR spectrum (CDCl<sub>3</sub>, 300 MHz) of compound 17

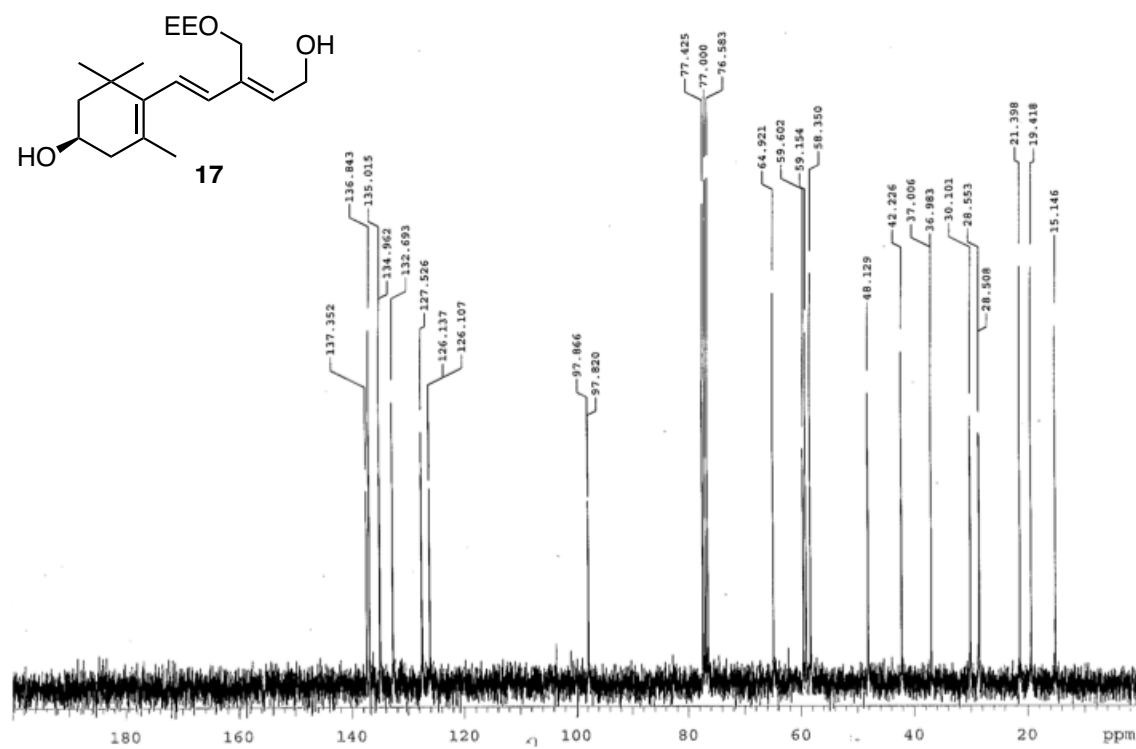

Figure S8. <sup>13</sup>C-NMR spectrum (CDCl<sub>3</sub>, 75 MHz) of compound 17

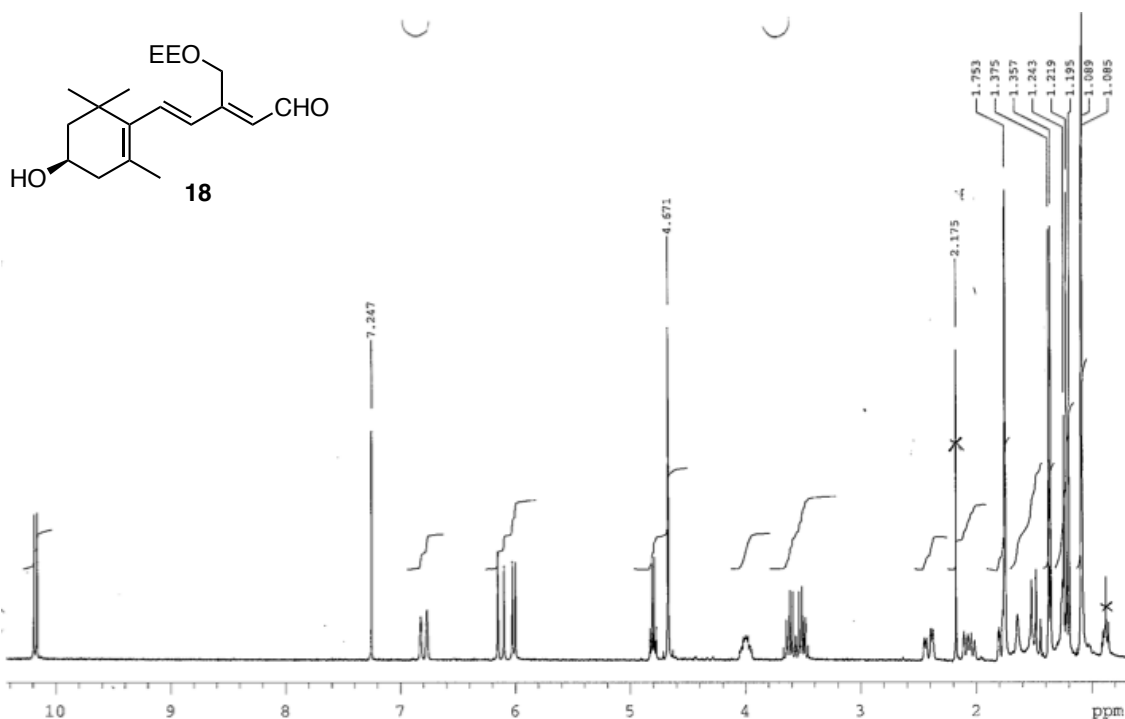

Figure S9. <sup>1</sup>H-NMR spectrum (CDCl<sub>3</sub>, 300 MHz) of compound **18**

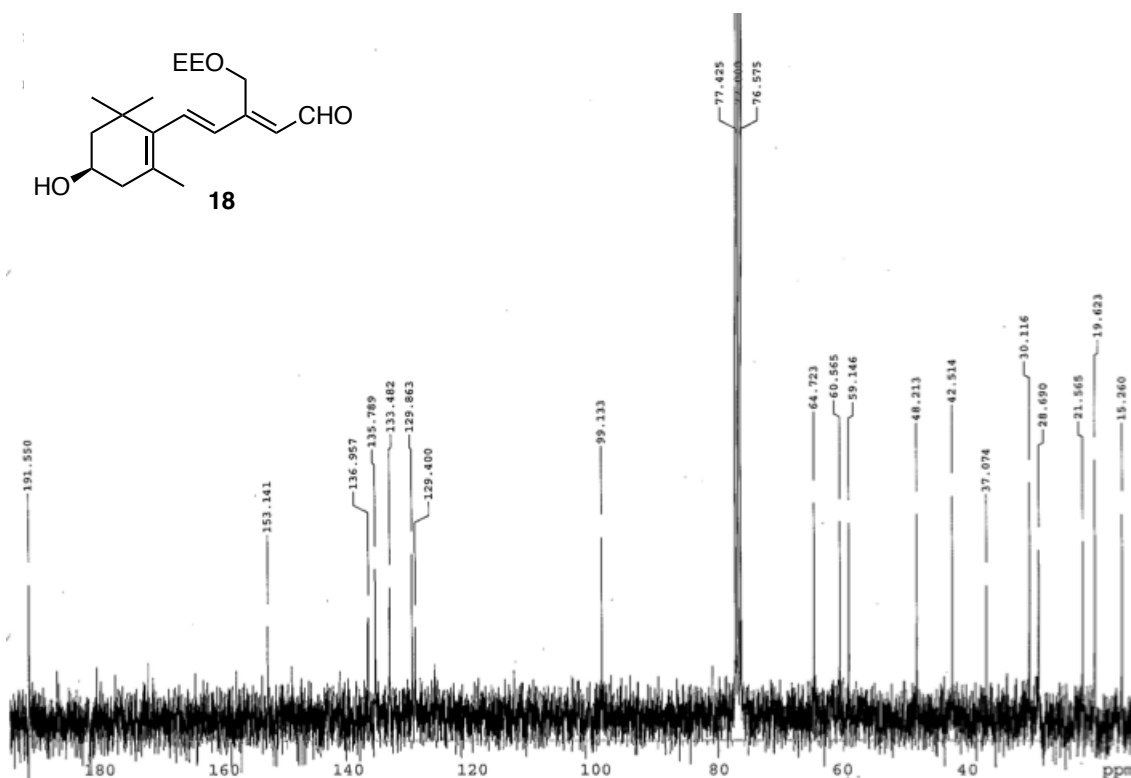

Figure S10. <sup>13</sup>C-NMR spectrum (CDCl<sub>3</sub>, 75 MHz) of compound **18**

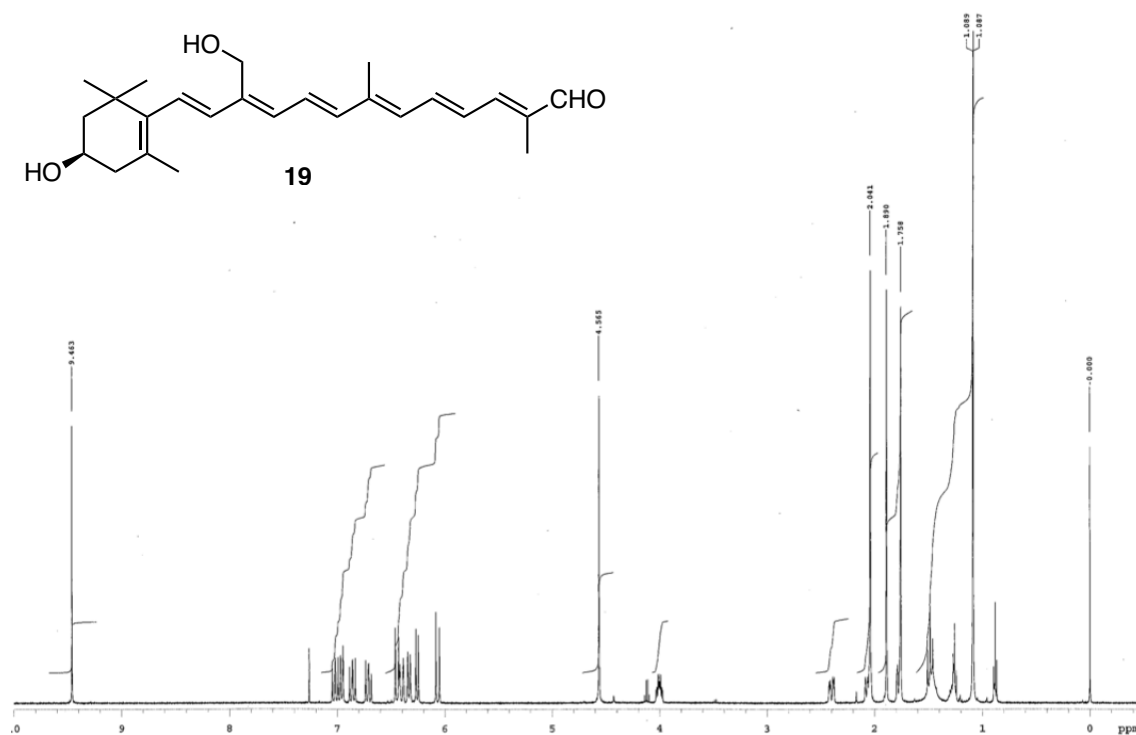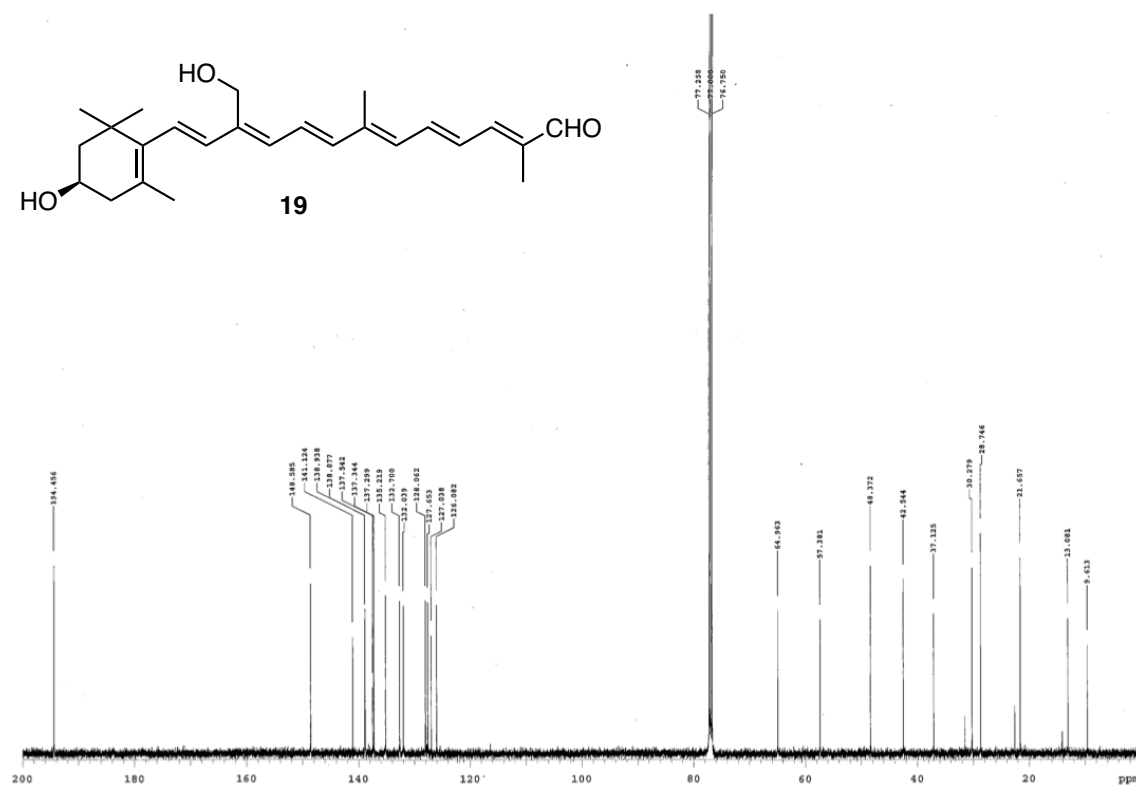





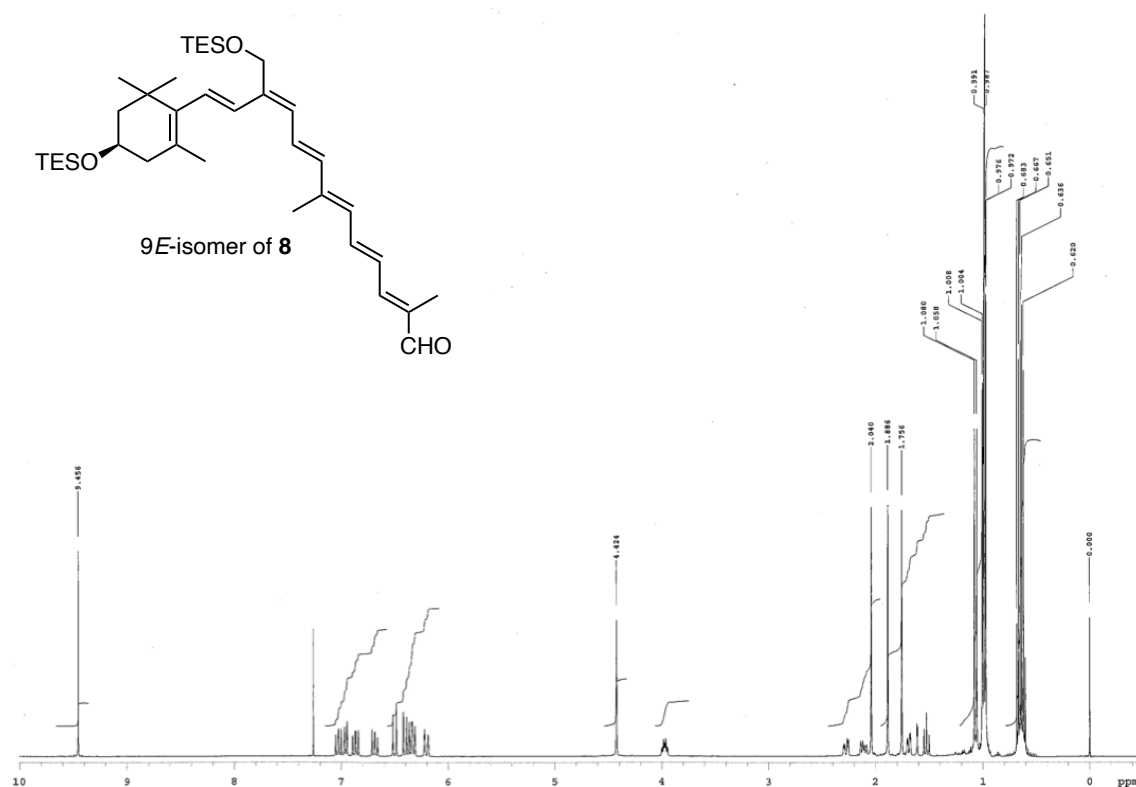

**Figure S15.**  $^1\text{H}$ -NMR spectrum (CDCl<sub>3</sub>, 500 MHz) of 9E-isomer of compound 8

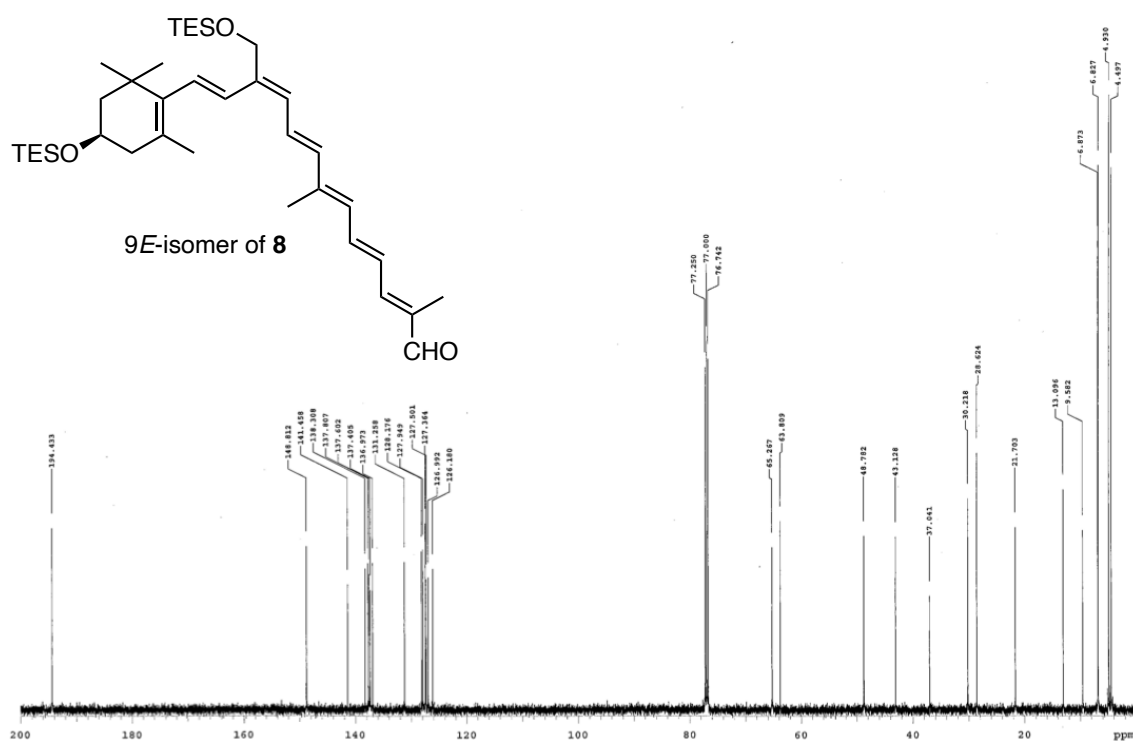

**Figure S16.**  $^{13}\text{C}$ -NMR spectrum (CDCl<sub>3</sub>, 125 MHz) of 9E-isomer of compound 8

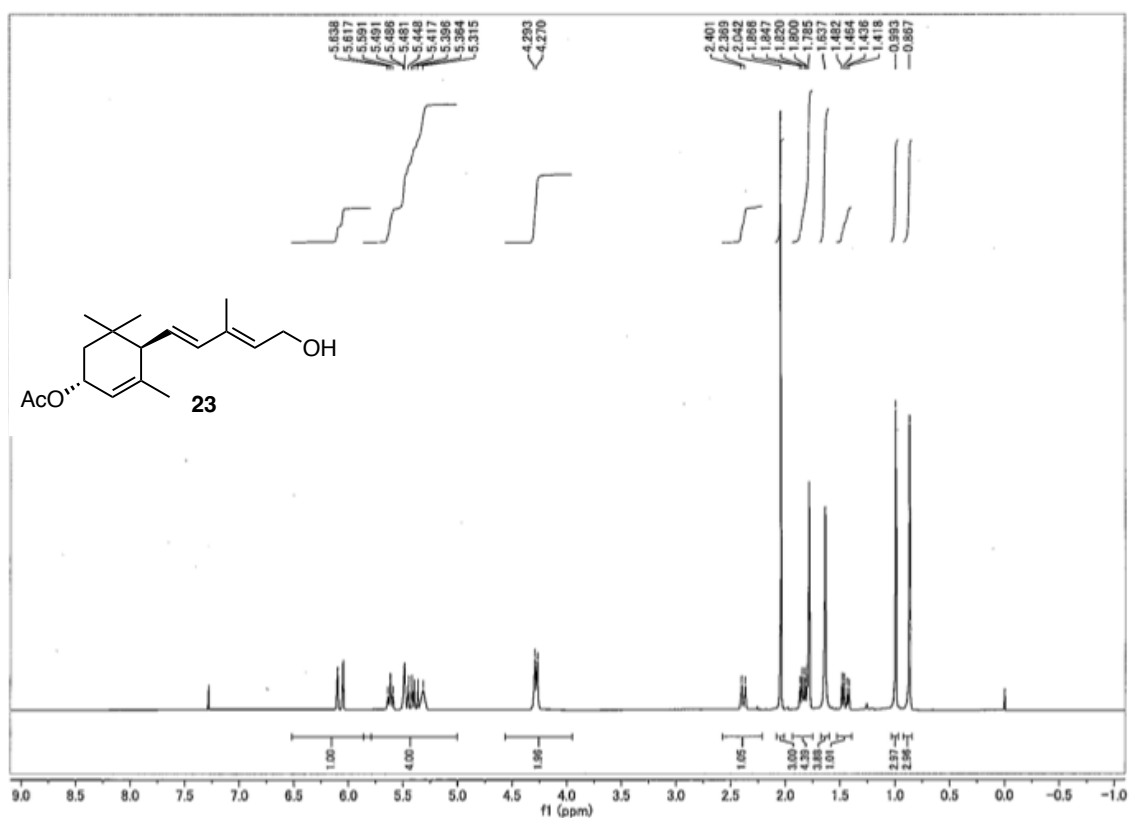

Figure S17. <sup>1</sup>H-NMR spectrum (CDCl<sub>3</sub>, 300 MHz) of compound **23**

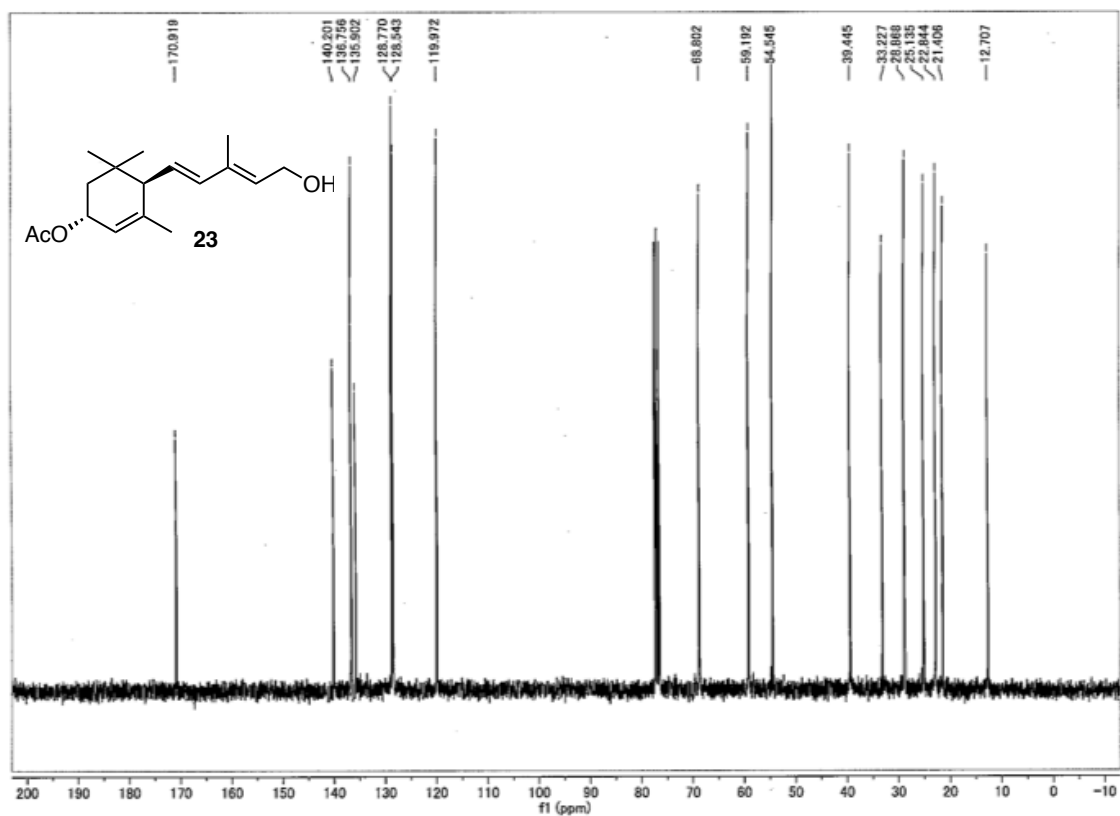

Figure S18. <sup>13</sup>C-NMR spectrum (CDCl<sub>3</sub>, 75 MHz) of compound **23**

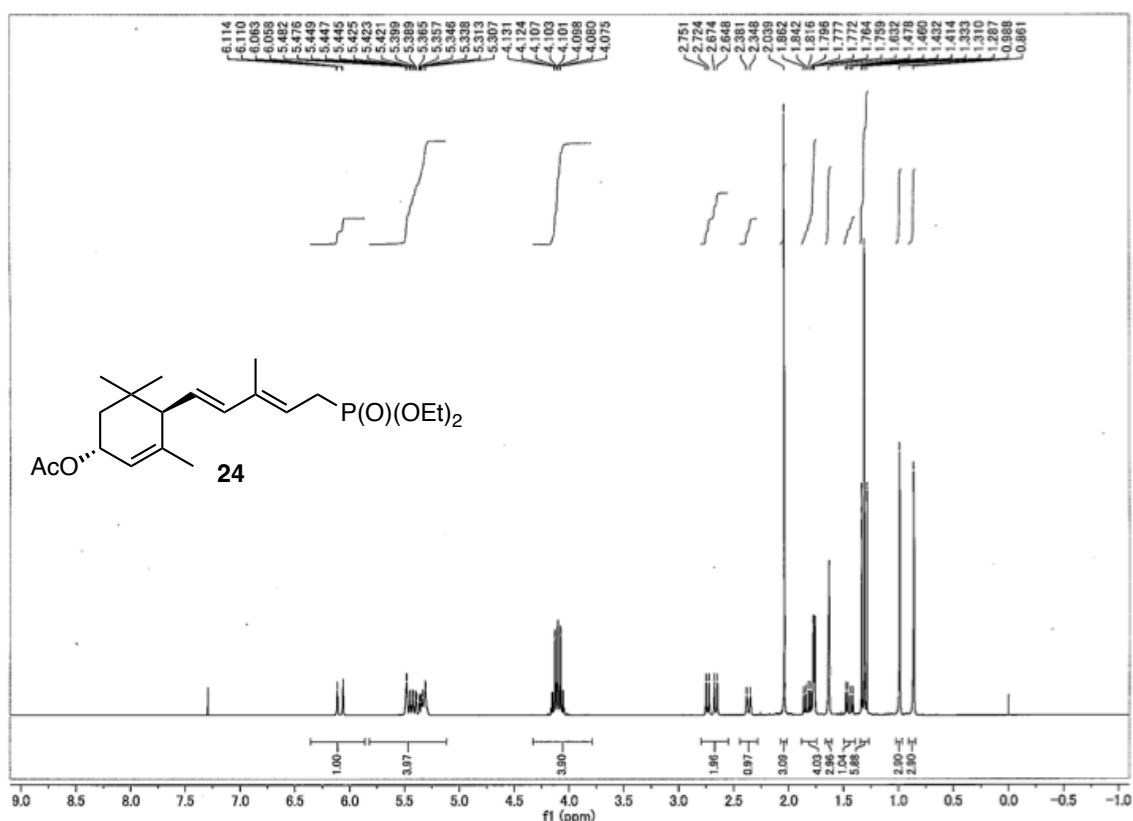

Figure S19. <sup>1</sup>H-NMR spectrum (CDCl<sub>3</sub>, 300 MHz) of compound 24

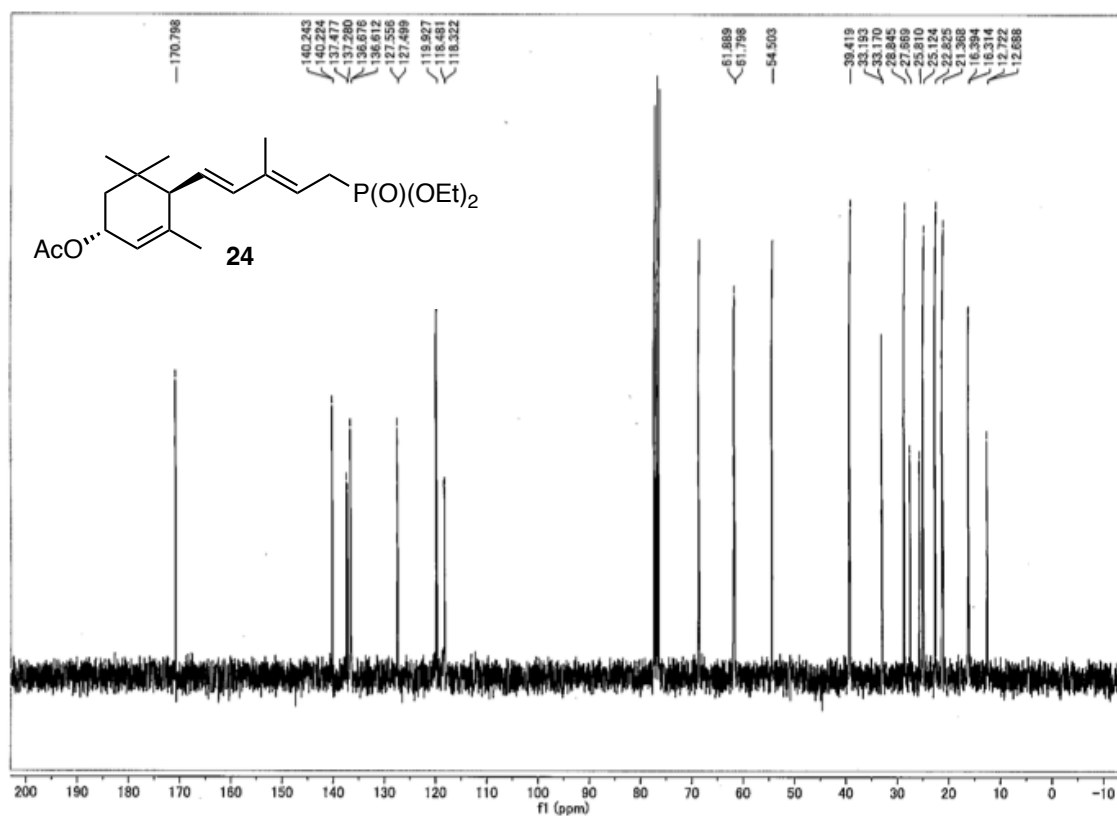

Figure S20. <sup>13</sup>C-NMR spectrum (CDCl<sub>3</sub>, 75 MHz) of compound 24

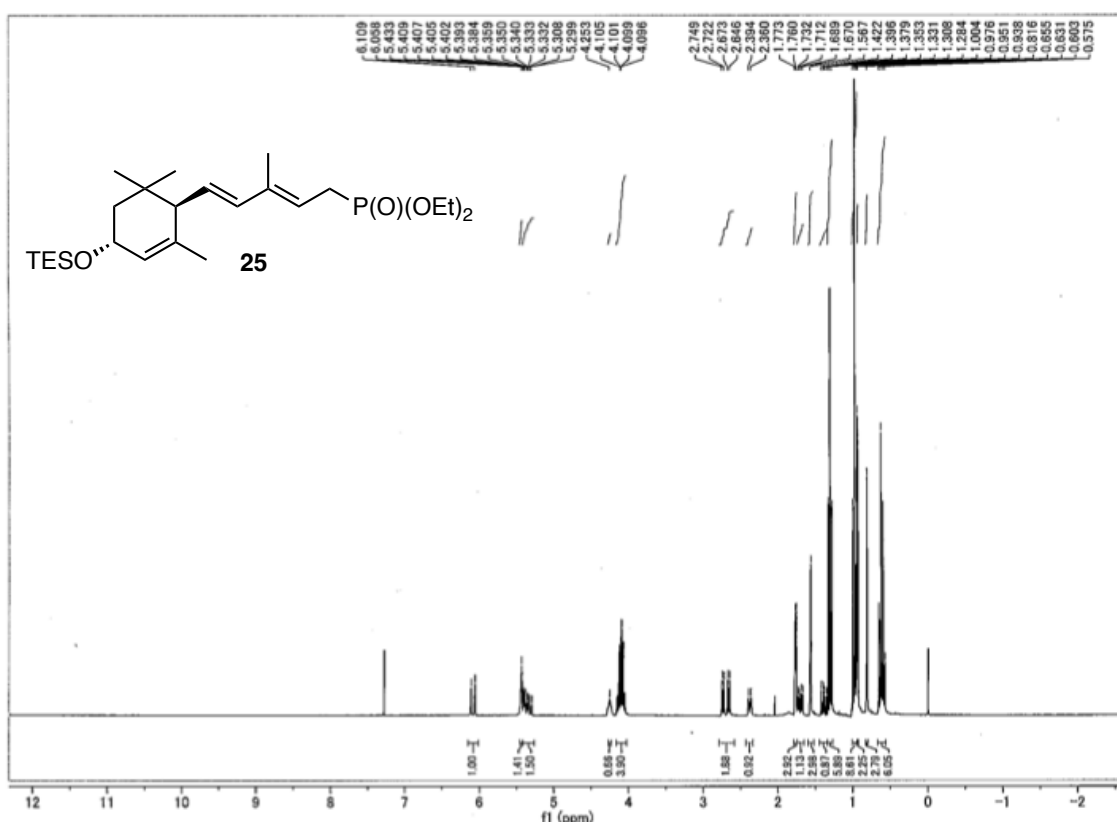

Figure S21. <sup>1</sup>H-NMR spectrum (CDCl<sub>3</sub>, 300 MHz) of compound **25**

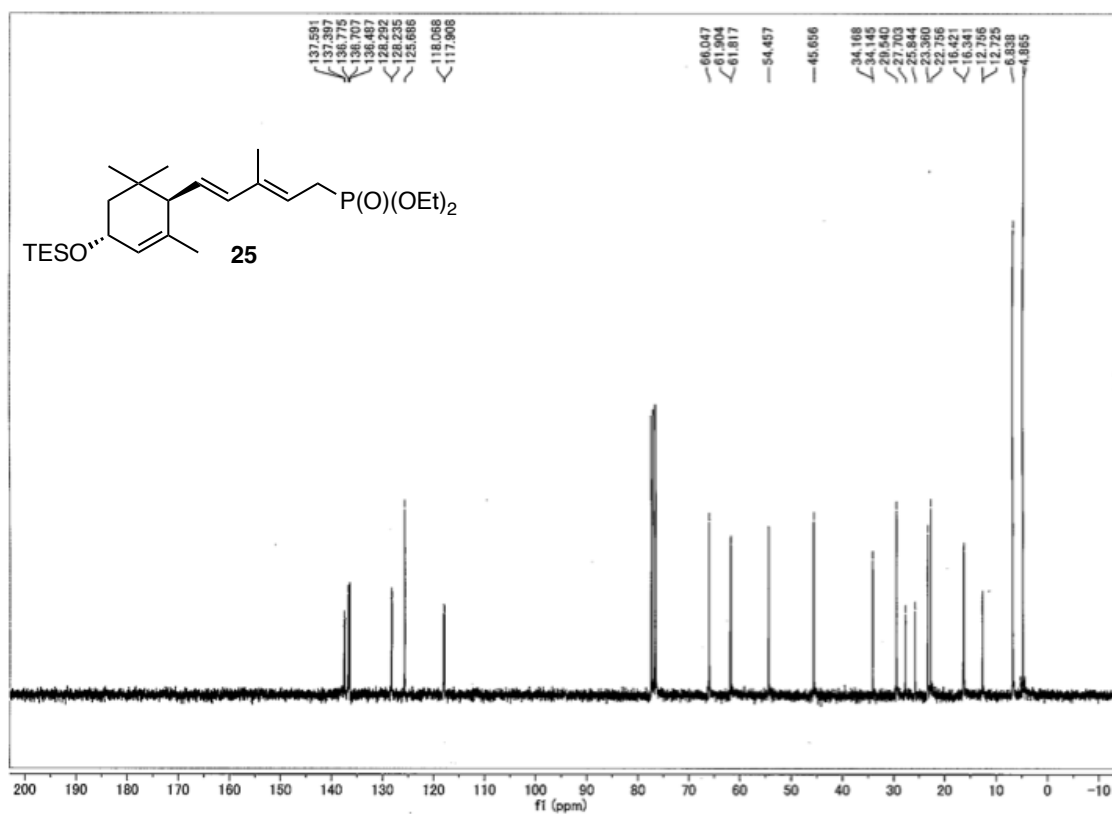

Figure S22. <sup>13</sup>C-NMR spectrum (CDCl<sub>3</sub>, 75 MHz) of compound **25**

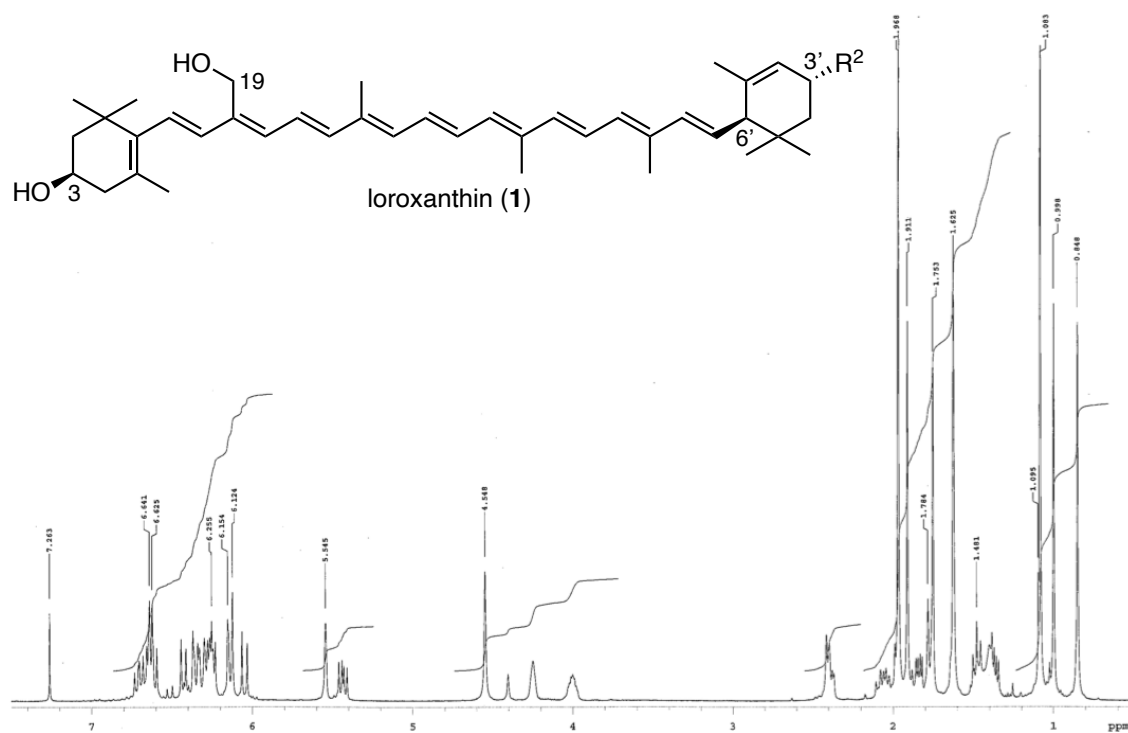

**Figure S19.**  $^1\text{H}$ -NMR spectrum ( $\text{CDCl}_3$ , 500 MHz) of loroxanthin (**1**)

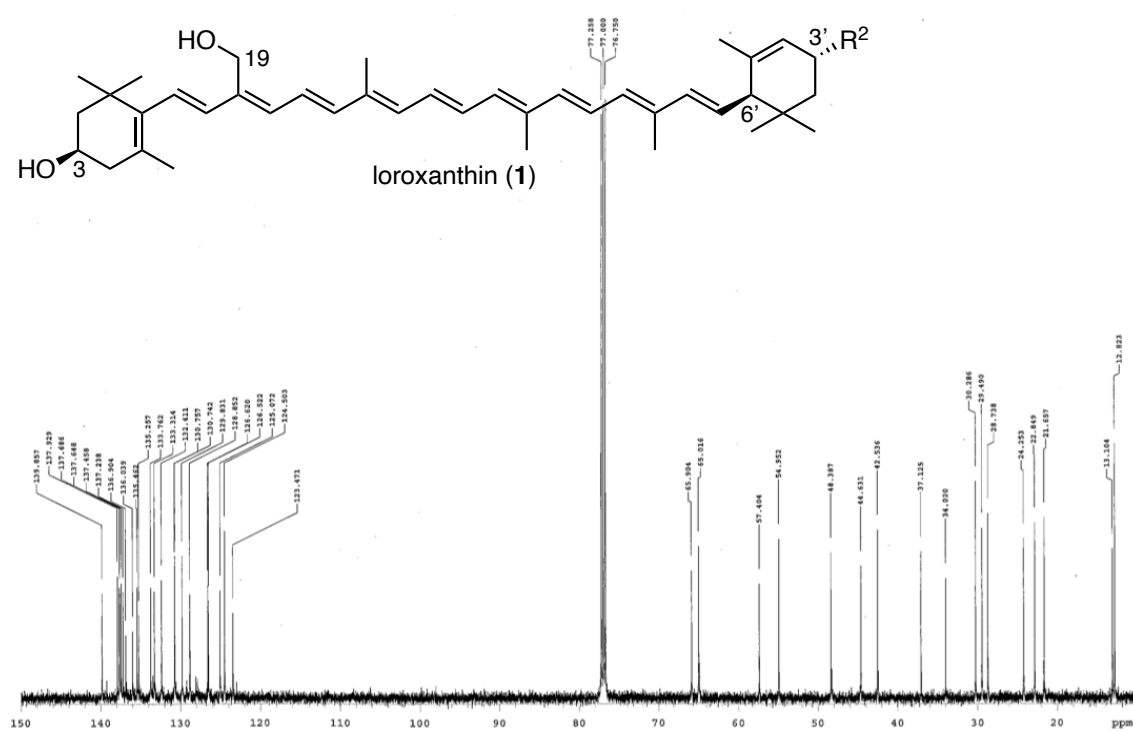

**Figure S20.**  $^{13}\text{C}$ -NMR spectrum ( $\text{CDCl}_3$ , 125 MHz) of loroxanthin (**1**)
